# Supplementary material
Source: PubMed Central journal article supplement (PMC2838524)
Supplement: 00417.2009_1.pdf [file 00417.2009_1.pdf]

Sup. Fig.1

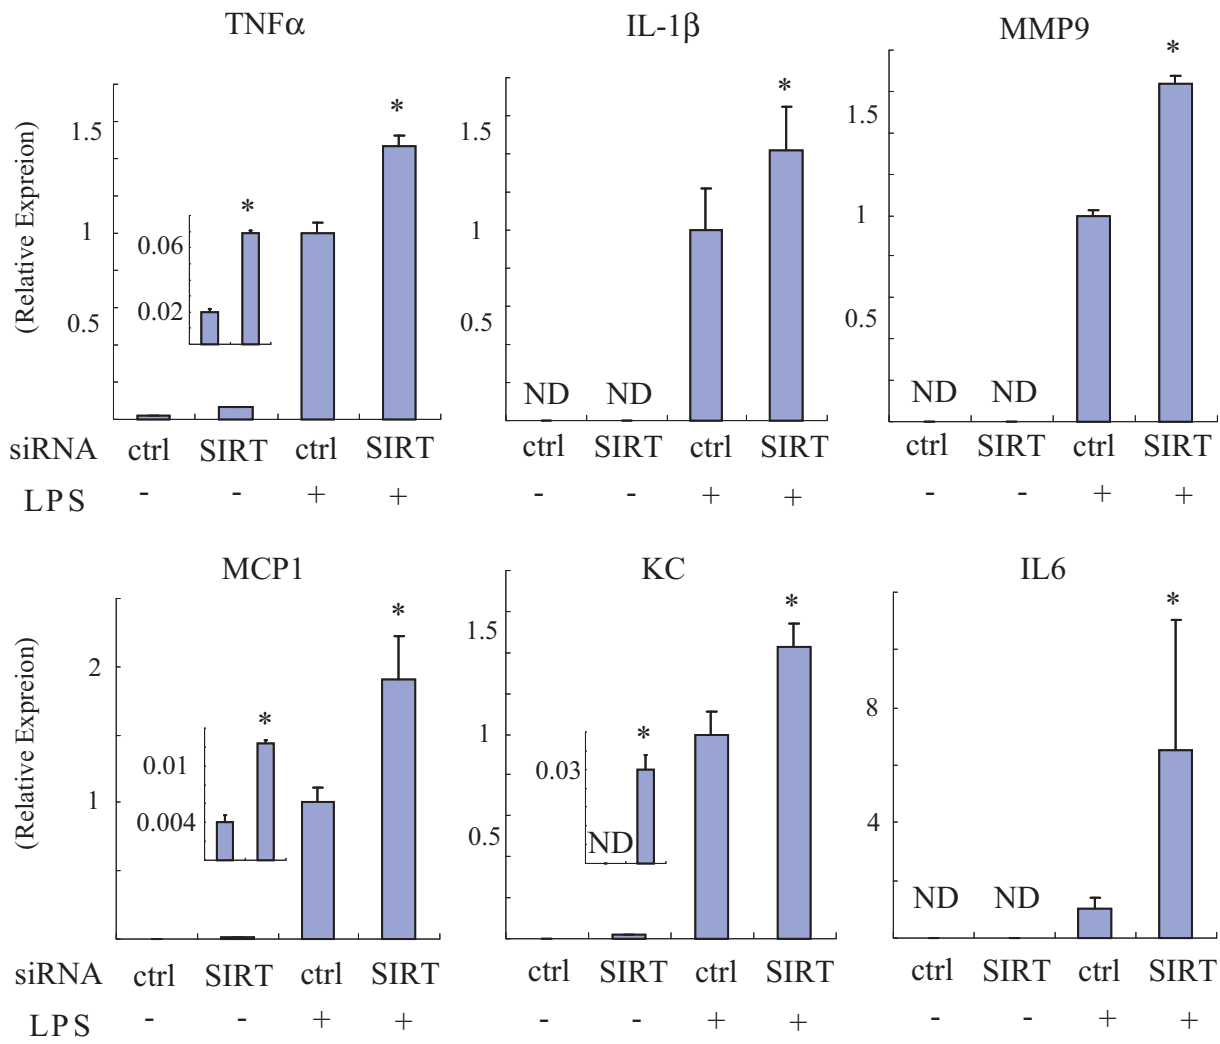

Sup. Fig.2

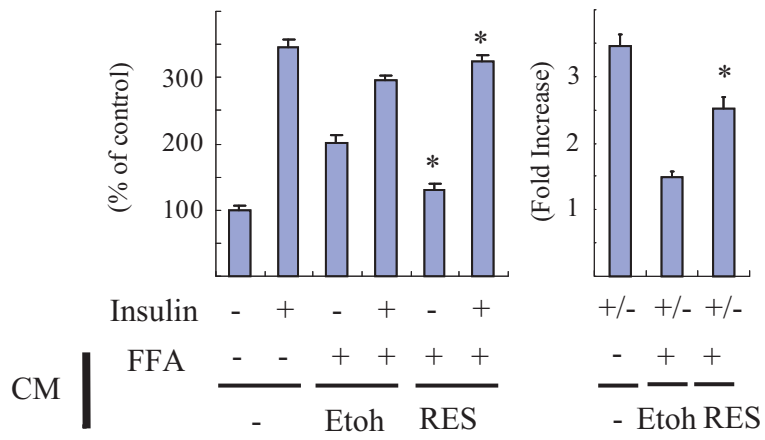

Sup. Fig.3

A

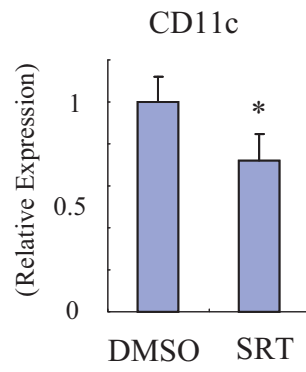

B

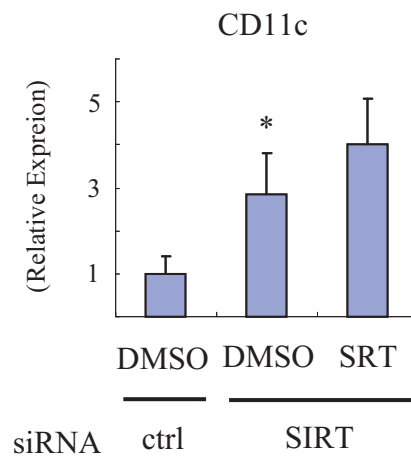

C

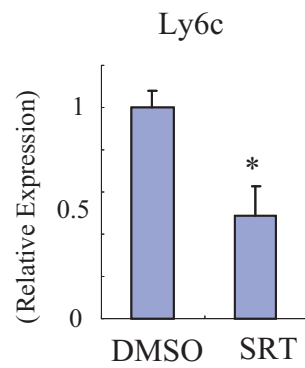

1 **Supplemental Figure 1** Effect of SIRT1 knockdown. The RAW264.7 macrophages  
2 were electroporated with control (ctrl) or SIRT1 (SIRT) siRNA. The cells were  
3 stimulated with or without 100 ng/ml LPS for 1 (TNF $\alpha$ ) or 3 hours (others), and total  
4 RNA was isolated, purified and then, quantitative real-time-PCR was performed. After  
5 the mRNA expression differences were normalized to a standard housekeeping gene  
6 (GAPDH) mRNA level, data are presented as the fold increase compared to control cells.  
7 The inset graphs show expanded data on LPS non-treated cells. Error bars represent the  
8 mean  $\pm$  s.e.m. (n=4). \* p<0.05 control versus SIRT1 siRNA, ND; not detectable.

9 **Supplemental Figure 2** Macrophage SIRT1 affects adipocyte insulin sensitivity. 3T3-  
10 L1 adipocytes were incubated with conditioned medium (CM) from vehicle (Etoh) or  
11 resveratrol (RES) treated RAW cells stimulated with 200  $\mu$ M palmitate (FFA), diluted  
12 1:250 in DME medium, for 3 hours prior to assays. The cells stimulated with insulin and  
13 then measured 2-deoxyglucose uptake. The graphs show the mean  $\pm$  s.e.m. and the values  
14 are expressed as % of control or fold basal (un-stimulated) glucose uptake (n=3). \*  
15 p<0.01 vehicle (Etoh) versus resveratrol (RES).

16 **Supplemental Figure 3** Effect of SRT1720. The RAW264.7 macrophages were  
17 electroporated with control (ctrl) or SIRT1 (SIRT) siRNA (B). After pretreatment of 0.1  
18  $\mu$ M SRT1720 (SRT) for 1 hour, the cells were stimulated with or without 100 ng/ml LPS  
19 for 24 hours, and total RNA was isolated, purified and then, quantitative real-time-PCR  
20 was performed. After the mRNA expression differences were normalized to a standard  
21 housekeeping gene (GAPDH) mRNA level, data are presented as the fold increase  
22 compared to control cells. Error bars represent the mean  $\pm$  s.e.m. (n=4). \* p<0.05 DMSO  
23 versus SRT or control versus SIRT1 siRNA.
